# Supplementary material
Source: publisher figshare collection journal article supplement (https://geolsoc.figshare.com/ndownloader/files/10398909)
Supplement: Supplementary file 1 [file 10398909]

| Supplemental Appendix 2: <i>Outcrop, sample, structural data, and vein and microscopic descriptions</i>                    |                          |                                               |                                                                                       |                                                                                                                                                                                                                                                                                            |                                                                                                                                                                                                                                                                                                                                                                                                                                                                                                                                                                                                                                                                                                                                                                                                                                                    |                                   |                                                                                                                                      |                                                                                            |                                                                                       |                                                                                       |                                                                                                                                   |                                                                                       |                                                                                       |  |
|----------------------------------------------------------------------------------------------------------------------------|--------------------------|-----------------------------------------------|---------------------------------------------------------------------------------------|--------------------------------------------------------------------------------------------------------------------------------------------------------------------------------------------------------------------------------------------------------------------------------------------|----------------------------------------------------------------------------------------------------------------------------------------------------------------------------------------------------------------------------------------------------------------------------------------------------------------------------------------------------------------------------------------------------------------------------------------------------------------------------------------------------------------------------------------------------------------------------------------------------------------------------------------------------------------------------------------------------------------------------------------------------------------------------------------------------------------------------------------------------|-----------------------------------|--------------------------------------------------------------------------------------------------------------------------------------|--------------------------------------------------------------------------------------------|---------------------------------------------------------------------------------------|---------------------------------------------------------------------------------------|-----------------------------------------------------------------------------------------------------------------------------------|---------------------------------------------------------------------------------------|---------------------------------------------------------------------------------------|--|
| Sample # & Age (Ma)                                                                                                        | GPS coord.               | Stratigraphic Unit                            | Wall rock lithology                                                                   | Structural Info/Orient'n                                                                                                                                                                                                                                                                   | Vein information                                                                                                                                                                                                                                                                                                                                                                                                                                                                                                                                                                                                                                                                                                                                                                                                                                   | U-Pb Analysis spatial information | Photograph #1                                                                                                                        | Photograph #2                                                                              | Photograph #3                                                                         | Photograph #4                                                                         | Photograph #5                                                                                                                     | Photograph #6                                                                         | Photograph #7                                                                         |  |
| DD-5                                                                                                                       | 50 37.337 N, 2 16.       | Lowermost Chalk less than 10m above Greensand | Grey to white thick bedded Chalk                                                      | Chalk dip steeply northwards, strikes ~E-W and has notable fracture cleavage dipping ~50S axial planar to monocline; there are some discreet faults within Chalk                                                                                                                           | Veins are along fracture cleavage planes but also in networks of fractures within this zone; crystals grow from wall to interior of veins and some are vuggy and some veins are decorated with slickensides                                                                                                                                                                                                                                                                                                                                                                                                                                                                                                                                                                                                                                        |                                   |                                                   |         |    |    |                                                |                                                                                       |                                                                                       |  |
|                                                                                                                            |                          |                                               |                                                                                       |                                                                                                                                                                                                                                                                                            |                                                                                                                                                                                                                                                                                                                                                                                                                                                                                                                                                                                                                                                                                                                                                                                                                                                    |                                   | East view; vertical bedding in lowermost chalk with S-dipping marked fracture cleavage making a network of fractures                 | East view; low angle post-cleavage fault with breccia                                      | network of fractures made by cleavage and bedding fracturing; view to east            | vein in fill within frcture network                                                   | veins within fracture network                                                                                                     |                                                                                       |                                                                                       |  |
| LC-3(1,2,3)<br>Subsamples 1,2, and 3 are from the same place but from different veins; 3(3) has no slickensides associated | 50° 37.157'W 2° 14       | Lowermost Chalk less than 20m above Greensand | Grey to white thick bedded Chalk                                                      | Chalk dip steeply northwards, strikes ~E-W and has notable fracture cleavage dipping ~50S axial planar to monocline;                                                                                                                                                                       | Veins are along fracture cleavage planes but also in networks of fractures within this zone; crystals grow from wall to interior of veins and some are vuggy and some veins are decorated with slickensides indicating movement after vein formation                                                                                                                                                                                                                                                                                                                                                                                                                                                                                                                                                                                               |                                   |                                                   |         |    |    |                                                |    |    |  |
|                                                                                                                            |                          |                                               |                                                                                       |                                                                                                                                                                                                                                                                                            |                                                                                                                                                                                                                                                                                                                                                                                                                                                                                                                                                                                                                                                                                                                                                                                                                                                    |                                   | View to west showing N-dipping bedding in Chalk with fractures that are steeper and which form a network of fractures/bedding cracks | Vein on outcrop surface showing its irregular shape and chalk amongst fractures            | Vuggy vein along somewhat irregular fracture                                          | Slickensides developed within fracture in Chalk                                       | Fractured chalk with steeply dipping fracture decorated with vuggy cream-coloured vein                                            | Vuggy vein within fracture in Chalk                                                   | 25mm diameter sample disc showing textures in veins against Chalk                     |  |
| LC-4(2)                                                                                                                    | 50° 37.157'W 2° 14       | Lowermost Chalk less than 20m above Greensand | Grey to white thick bedded Chalk                                                      | Chalk dip steeply northwards, strikes ~E-W and has notable fracture cleavage dipping ~50S axial planar to monocline;                                                                                                                                                                       | Veins are along fracture cleavage planes but also in networks of fractures within this zone; crystals grow from wall to interior of veins and some are vuggy and some veins are decorated with slickensides indicating movement after vein formation                                                                                                                                                                                                                                                                                                                                                                                                                                                                                                                                                                                               |                                   | see above as these types of fractures are common to this locality at the same GPS                                                    |                                                                                            |                                                                                       |                                                                                       |                                                                                                                                   |                                                                                       |                                                                                       |  |
|                                                                                                                            |                          |                                               |                                                                                       |                                                                                                                                                                                                                                                                                            |                                                                                                                                                                                                                                                                                                                                                                                                                                                                                                                                                                                                                                                                                                                                                                                                                                                    |                                   |                                                                                                                                      |                                                                                            |                                                                                       |                                                                                       |                                                                                                                                   |                                                                                       |                                                                                       |  |
| LC-5(1,2)                                                                                                                  | 50° 37.157'W 2° 14.294'N | Lowermost Chalk less than 20m above Greensand | Grey to white thick bedded Chalk                                                      | Chalk dip steeply northwards, strikes ~E-W and has notable fracture cleavage dipping ~50S axial planar to monocline;                                                                                                                                                                       | Veins are along fracture cleavage planes but also in networks of fractures within this zone; crystals grow from wall to interior of veins and some are vuggy and some veins are decorated with slickensides indicating movement after vein formation                                                                                                                                                                                                                                                                                                                                                                                                                                                                                                                                                                                               |                                   | see above as these types of fractures are common to this locality at the same GPS                                                    |                                                                                            |                                                                                       |                                                                                       |                                                                                                                                   |                                                                                       |                                                                                       |  |
|                                                                                                                            |                          |                                               |                                                                                       |                                                                                                                                                                                                                                                                                            |                                                                                                                                                                                                                                                                                                                                                                                                                                                                                                                                                                                                                                                                                                                                                                                                                                                    |                                   |                                                                                                                                      |                                                                                            |                                                                                       |                                                                                       |                                                                                                                                   |                                                                                       |                                                                                       |  |
| LC-6                                                                                                                       | 50° 37.166'W 2° 14.893'N | Lower Chalk                                   | Grey to white thick bedded Chalk                                                      | Chalk dip steeply northwards, strikes ~E-W and has notable fracturs with some development of slickensides                                                                                                                                                                                  | Veins are along fracture cleavage planes but also in networks of fractures within this zone; crystals grow from wall to interior of veins and some are vuggy and some veins are decorated with slickensides indicating movement after vein formation                                                                                                                                                                                                                                                                                                                                                                                                                                                                                                                                                                                               |                                   |                                                 |       |  |  |                                              |                                                                                       |                                                                                       |  |
|                                                                                                                            |                          |                                               |                                                                                       |                                                                                                                                                                                                                                                                                            |                                                                                                                                                                                                                                                                                                                                                                                                                                                                                                                                                                                                                                                                                                                                                                                                                                                    |                                   | vein with vuggy texture                                                                                                              | photograph of chalk with network of veins, looking N                                       | slickensides on surface of chalk                                                      | detail                                                                                |                                                                                                                                   |                                                                                       |                                                                                       |  |
| SB-2                                                                                                                       | 50o 39.935'N 1o 6.467'W  | Lowermost Chalk less than 30m above Greensand | Grey to white thick bedded Chalk; thickly bedded, massive and devoid of flint nodules | Chalk dips 110/55N steeply north, has notable fracture cleavage dipping ~50S axial planar to monocline; slickensides' trend/plunge 210 / 25-30;                                                                                                                                            | Veins are along fracture cleavage planes but also in networks of fractures within this zone; SB-2 consists of 3 fragments each is like a tapered slickensided fragment, quite thin and tapering to near zero thickness. Each is effectively a vein within a sheared slickensided zone. Internally each has an asymmetric sheared fabric with thin sub-veins of vein as well as thin Chalk layers. Veins are colourless glassy crystals but there could be new slickenfibres growth.                                                                                                                                                                                                                                                                                                                                                                |                                   |                                                 |       |  |  |                                              |  |                                                                                       |  |
|                                                                                                                            |                          |                                               |                                                                                       |                                                                                                                                                                                                                                                                                            |                                                                                                                                                                                                                                                                                                                                                                                                                                                                                                                                                                                                                                                                                                                                                                                                                                                    |                                   | View to west of lower thick bedded chalk just above Greensand showing N dip and some S-dipping fractures                             | Outcrop view of thick bedded chalk                                                         | thin veins of calcite with some slickensides plastered across outcrop; view to North  | Close up view of thin vein with some slickensides                                     | View to east showing N dipping bedding and both steep and more shallowly dipping fractures, all decorated with veins with slick's | Reflected light view of grain mount                                                   |                                                                                       |  |
| SB-3(1)                                                                                                                    | 50o 39.943'N 1o 6.621'W  | Lowermost Chalk less than 30m above Greensand | Grey to white thick bedded Chalk; thickly bedded, massive and devoid of flint nodules | Strike and dip of bedding ; 110 / 55-60 N; Fracture cleavage strike and dip : 140 / 30 SW; Slickenside trend and plunge : 170 / 25; This sample is of impressive 1 cm thick veins that have an assymetric step-like fabric induced probably by shear developing these complex slickensides | Initially a thicker vein of calcite 0.5 – 1cm thick formed along a fracture cleavage plane. This vein is then sheared within a wider zone. Samples collected have a bottom surface of Chalk with stepped streaked slickensides. Adjacent to this and on the top of the samples are thick coarser veins of calcite so the veins are several mm and the grain size is up to 2mm. These thicker veins have a micro stepped appearance apparently produced by extensional fracturing of the coarser vein with infill calcite between these extensional fractures. There also appears to be shear band type development within the coarser vein which produces assymmetric fine grained new calcite growth. In my opinion the shear sense of both the top and the bottom are consistent. These samples have several generations of vein calcite growth. |                                   |                                                 |       |  |  |                                              |  |  |  |
|                                                                                                                            |                          |                                               |                                                                                       |                                                                                                                                                                                                                                                                                            |                                                                                                                                                                                                                                                                                                                                                                                                                                                                                                                                                                                                                                                                                                                                                                                                                                                    |                                   | West view of lowermost Chalk, thick bedded, dipping north                                                                            | View to north of plane of fracture cleavage with vein plastered upon this fracture surface | Step-like slickensides, view to N on fracture cleavage surface                        | fracture surface with slickensides                                                    | Step-like slickensides, view to N on fracture cleavage surface                                                                    | Step-like slickensides, view to N on fracture cleavage surface                        | Step-like slickensides, view to N on fracture cleavage surface                        |  |



| Sample # & Age (Ma) | GPS coord.               | Stratigraphic Unit | Wall rock lithology                                                                      | Structural Info/Orient'n                                                                                                                                                                                        | Vein information                                                                                                                                                                                                                                                                                                                                                | U-Pb Analysis spatial information | Photograph #1                                                                                                                                                                                             | Photograph #2                                                                              | Photograph #3                                                                                                                        | Photograph #4                                                                                 | Photograph #5                                                                                        | Photograph #6                                                                         | Photograph #7                                                                                 |
|---------------------|--------------------------|--------------------|------------------------------------------------------------------------------------------|-----------------------------------------------------------------------------------------------------------------------------------------------------------------------------------------------------------------|-----------------------------------------------------------------------------------------------------------------------------------------------------------------------------------------------------------------------------------------------------------------------------------------------------------------------------------------------------------------|-----------------------------------|-----------------------------------------------------------------------------------------------------------------------------------------------------------------------------------------------------------|--------------------------------------------------------------------------------------------|--------------------------------------------------------------------------------------------------------------------------------------|-----------------------------------------------------------------------------------------------|------------------------------------------------------------------------------------------------------|---------------------------------------------------------------------------------------|-----------------------------------------------------------------------------------------------|
| CB-3                | 50o 40.064'N 1o 29.346'W | Lowermost Chalk    | Thick bedded medium grey chalk without flint nodules                                     | bedding 080/40N; fracture cleavage is 040/60SE; slickensides plunge south                                                                                                                                       | fractures have veins of calcite many of which are vuggy; most fractures relate in origin to fracture cleavage or form in networks of fractures made by intersections of fracture cleavage and bedding                                                                                                                                                           |                                   |                                                                                                                        |         |                                                   |            |                   |    |            |
|                     |                          |                    |                                                                                          |                                                                                                                                                                                                                 |                                                                                                                                                                                                                                                                                                                                                                 |                                   | East view of lowermost Chalk with Needles peninsula in background,                                                                                                                                        |                                                                                            | thin calcite seam developed on fracture cleavage surface                                                                             | network of irregular and in part sheared veins, looking north                                 | view of obliquely exposed vein with slickensides indicating shear following formation                | network of irregular and in part sheared veins, looking north                         | microscopic view of vein fragments, partly showing vugs growing away from the wall rock Chalk |
| CB-4(2)             | 50o 40.071'N 1o 29.389'W | Lowermost Chalk    | Thick bedded medium grey chalk without flint nodules                                     | bedding 080/40N; fracture cleavage is 040/60SE; slickensides plunge south                                                                                                                                       | This sample consists of the originally planar veins but now have well developed slickensides. Some of these veins were originally up to 4mm thick fracture fills but due to shear are thinner and variable thickness; it is unclear as to whether there is any new calcite growth.                                                                              |                                   |                                                                                                                        |         |                                                   |                                                                                               |                                                                                                      |                                                                                       |                                                                                               |
|                     |                          |                    |                                                                                          |                                                                                                                                                                                                                 |                                                                                                                                                                                                                                                                                                                                                                 |                                   | Veins with slickensides                                                                                                                                                                                   | Eastward view showing N dipping Chalk with very well developed S-dipping fracture cleavage | Thin cross sections of slickensided plates showing vein crystals that have been truncated by slip or shearing on microfault surfaces |                                                                                               |                                                                                                      |                                                                                       |                                                                                               |
| CB-2                | 50o 40.006'N 1o 29.052'W | Upper Greensand    | Grey limy calcareous sandstone with detrital fragments of fine grain sand and silt sizes |                                                                                                                                                                                                                 | Greensand with fractures was not observed along foreshore but this is a sample from a larger fallen boulder from Greensand cliffs that contains a planar sharp walled calcite fracture 3mm thick. The vein has sharp planar wall contact, with very thin milky initial deposit that grades sharply into transparent/clear glassy calcite with grain size 1-3mm. |                                   |                                                                                                                        |                                                                                            |                                                   |            |                                                                                                      |                                                                                       |                                                                                               |
|                     |                          |                    |                                                                                          |                                                                                                                                                                                                                 |                                                                                                                                                                                                                                                                                                                                                                 |                                   | View to the northwest along the foreshore of Compton Bay, Isle of Wight showing Chalk on left, dipping ~50-60 degrees to the north and in the right hand photo, Weald and Greensand dipping less steeply. |                                                                                            | Fragments of wall rock and vein from sample CB-2, showing some of the locations of spots analysed. Reflected light view.             | Plain view of vein fragments analysed by U-Pb; note the laminations and texture of the veins. |                                                                                                      |                                                                                       |                                                                                               |
| DD-1                | 50o 37.285N, 2o 16.561 W | Purbeck Limestone  | Limestone bed 0.5m thick in upper 5m of Purbeck within a shaley-limestone succession     | Purbeck bedding is vertical and east-striking on N limb of Purbeck monocline; vein is nearly horizontal and is lensoid in shape, 0.3-1cm thick in the upper part of the bed as a clean calcite filled fracture. | vein is nearly horizontal and is lensoid in shape, 0.3-1cm thick in the upper part of the bed as a clean calcite filled fracture. The vein only penetrates part of the bed                                                                                                                                                                                      |                                   |                                                                                                                       |        |                                                  |           |                  |   |                                                                                               |
|                     |                          |                    |                                                                                          |                                                                                                                                                                                                                 |                                                                                                                                                                                                                                                                                                                                                                 |                                   | View to east of bed of indurated limestone between shaley layers; vein is 2/3 towards top of photo                                                                                                        | Vein within bed; not its flat orientation, orthogonal to bedding                           | Detail of vein                                                                                                                       | reflected light view of grain mount                                                           | Detail of analysed region; the most favourable retions were close to wall of vein where U is higher. | More detail of vein fragment showing spots analysed.                                  |                                                                                               |
| DD-2                | 50o 37.285N, 2o 16.561 W | Purbeck Limestone  | Limestone bed 0.5m thick in upper 5m of Purbeck within a shaley-limestone succession     | Purbeck bedding is vertical and east-striking on N limb of Purbeck monocline; veins are nearly horizontal and                                                                                                   | The veins are a quasi-parallel anastomosing network, thin and some lens like. They give the appearance of the rock being shattered. The veins are up to 6 – 7 mm thick. They taper in thickness over distances of 5 – 20cm to zero cm.                                                                                                                          |                                   |                                                                                                                      |       |                                                 |          |                 |  |          |
|                     |                          |                    |                                                                                          |                                                                                                                                                                                                                 |                                                                                                                                                                                                                                                                                                                                                                 |                                   | Vertical bed with orthogonal network of shattering filled with calcite; looking east; vertical limb of fold                                                                                               | Vertical bed with orthogonal network of shattering filled with calcite, detail             | reflected light view of grain mount                                                                                                  | reflected light view of grain mount                                                           | reflected light view of grain mount                                                                  | reflected light view of grain mount                                                   | reflected light view of grain mount                                                           |
| DD-3                | 50o 37.285N, 2o 16.561 W | Purbeck Limestone  | Limestone bed 0.5m thick in upper 5m of Purbeck within a shaley-limestone succession     | Purbeck bedding is vertical and east-striking on N limb of Purbeck monocline; vein is from a loose boulder of the same rocks and is about 1cm thick                                                             |                                                                                                                                                                                                                                                                                                                                                                 |                                   |                                                                                                                      |       |                                                 |          |                                                                                                      |                                                                                       |                                                                                               |
|                     |                          |                    |                                                                                          |                                                                                                                                                                                                                 |                                                                                                                                                                                                                                                                                                                                                                 |                                   | reflected light view of grain mount                                                                                                                                                                       | reflected light view of grain mount                                                        | reflected light view of grain mount                                                                                                  | reflected light view of grain mount                                                           |                                                                                                      |                                                                                       |                                                                                               |
| DD-4                | 50o 37.285N, 2o 16.561 W | Purbeck Limestone  | Limestone bed 0.5m thick in upper 5m of Purbeck within a shaley-limestone succession     | Purbeck bedding is vertical and east-striking on N limb of Purbeck monocline; vein is nearly horizontal and is lensoid in shape, 0.3-1cm thick in the upper part of the bed as a clean calcite filled fracture. | thin in situ vein (orthogonal) from a 1m thick limestone layer in Purbeck beds                                                                                                                                                                                                                                                                                  |                                   |                                                                                                                      |       |                                                 |          |                 |  |                                                                                               |
|                     |                          |                    |                                                                                          |                                                                                                                                                                                                                 |                                                                                                                                                                                                                                                                                                                                                                 |                                   | Vertical bed with orthogonal calcite filled vein in fracture; looking east; vertical limb of fold; looking east                                                                                           |                                                                                            | reflected light view of grain mount                                                                                                  | reflected light view of grain mount                                                           | reflected light view of grain mount                                                                  | reflected light view of grain mount                                                   |                                                                                               |
| MoW-1               | 50° 37.206'W 2° 16.485'N | Purbeck beds       | limestone layer adjacent shaley organic bed with woody? Debris                           | vein strike/dip 190/80E                                                                                                                                                                                         | Near the top of the Purbeck beds at the west end of Man o' War Bay just near bottom of steps. Ribs of Purbeck here have some fractures and there is a zoned vein that cross-cuts a layer containing woody organic black fragments. Vein texture shows several zones of growth.                                                                                  |                                   |                                                                                                                      |       |                                                 |          |                 |  |          |



| Sample # & Age (Ma) | GPS coord.                                                                     | Stratigraphic Unit     | Wall rock lithology                                                                        | Structural Info/Orient'n                                                                                                              | Vein information                                                                                                                                                                                                                                                                                                                                                                                                                                              | U-Pb Analysis spatial information | Photograph #1                                                                                                                                                                                 | Photograph #2                                                                                     | Photograph #3                                                                         | Photograph #4                                                                                                            | Photograph #5                                                                         | Photograph #6                                                                       | Photograph #7                                                                       |
|---------------------|--------------------------------------------------------------------------------|------------------------|--------------------------------------------------------------------------------------------|---------------------------------------------------------------------------------------------------------------------------------------|---------------------------------------------------------------------------------------------------------------------------------------------------------------------------------------------------------------------------------------------------------------------------------------------------------------------------------------------------------------------------------------------------------------------------------------------------------------|-----------------------------------|-----------------------------------------------------------------------------------------------------------------------------------------------------------------------------------------------|---------------------------------------------------------------------------------------------------|---------------------------------------------------------------------------------------|--------------------------------------------------------------------------------------------------------------------------|---------------------------------------------------------------------------------------|-------------------------------------------------------------------------------------|-------------------------------------------------------------------------------------|
|                     |                                                                                |                        |                                                                                            |                                                                                                                                       |                                                                                                                                                                                                                                                                                                                                                                                                                                                               |                                   | Looking south at vertically dipping rib of Purbeck with vertical fracture cutting across the bed.                                                                                             | Looking south at vertically dipping rib of Purbeck with vertical fracture cutting across the bed. | Detail of vein showing compositional variation                                        |                                                                                                                          | grain mount fragments                                                                 | reflected light view of grain mount                                                 | grain mount                                                                         |
| SH-1                | 50° 37.072'W 2° 15.110'N                                                       | Purbeck                | Thick (1m) layer of hard limestone with veins impregnated with tar from oil seep           | Strike 090/near vertical dip                                                                                                          | At this locality large vuggy layers are exposed across cracks in Purbeck and oil tarry material is in the cracks, on the vugs, and within vugs. There are conspicuous vuggy veins with coarse crystals of calcite and tar can be found between grains, on the outcrop surface and within pores of veins                                                                                                                                                       |                                   |                                                                                                            |                |    |                                       |    |  |                                                                                     |
|                     |                                                                                |                        |                                                                                            |                                                                                                                                       |                                                                                                                                                                                                                                                                                                                                                                                                                                                               |                                   | View to SE of vertically dipping vein covered with vuggy calcite                                                                                                                              | View to NE showing tar impregnation on and within vein                                            | View to E of fracture filled with calcite, dipping vertically                         | Detail of cross section of vein exposed on right side of photo, looking S                                                | reflected light view of grain mount                                                   | grain mount showing wall rock, vuggy crystals, etc.                                 |                                                                                     |
| SH-2                | 50° 37.082'W 2° 15.111'N                                                       | Purbeck                | Thick (1m) layer of hard limestone with veins                                              | Strike 090/near vertical dip                                                                                                          | Slabs of Purbeck limestone with abundant fractures in part forming a conjugate set. The samples comprising this site are from two parts of this vein: the conjugate portion and the lower fractures that bisect the orientation of the conjugates. There is an abundance of E-W extensional fractures in Purbeck competent beds.                                                                                                                              |                                   |                                                                                                            |                |    |                                       |    |  |                                                                                     |
|                     |                                                                                |                        |                                                                                            |                                                                                                                                       |                                                                                                                                                                                                                                                                                                                                                                                                                                                               |                                   | Purbeck bed looking down, North to top, shows extension with wedge bounded by conjugate fractures merging into orthogonal fracture                                                            | location of one sub-sample                                                                        | location of another sub-sample                                                        | other adjacent fractures                                                                                                 | reflected light view of grain mount                                                   |                                                                                     |                                                                                     |
| SH-3                | 50° 37.099'W 2° 15.200'N near the west end of the bottom of Stair Hole         | Purbeck limestone      | in exposed ribs of Purbeck beneath the mudslides of the slope to north and cliffs to west. | Beds strike E-W and dip near vertically                                                                                               | fault that cross-cuts a veined fracture parallel to fault, which in turn is sheared to produce slickensides. SH-3 is collected from veins along this fracture/fault. Slickensides are nearly horizontal and trend 210degrees and plunge about 20degrees.                                                                                                                                                                                                      |                                   |                                                                                                            |                |    |                                       |    |  |  |
|                     |                                                                                |                        |                                                                                            |                                                                                                                                       |                                                                                                                                                                                                                                                                                                                                                                                                                                                               |                                   | View to W of vertical bed that is offset by small conjugate fault that itself offsets a pre-existing vein with well developed slickensides                                                    | detail                                                                                            | detail of slickensides on vein                                                        | view to West looking up a bit showing vertically dipping beds that have listric offset, indicating E-W extension of beds | reflected light view of grain mount                                                   |                                                                                     | reflected light view of grain mount                                                 |
| SH-4                | 018 50° 37.098'W 2° 15.200'N 10 metres from SH-3                               | Purbeck limestone      | Oyster shell Purbeck bed                                                                   | bedding E-W striking and nearly vertical                                                                                              | There is an abundance of E-W extensional fractures in Purbeck competent beds here in the oyster shell layer with slickensided vein. Slickensides are nearly horizontal and trend 050degrees and plunge about 20degrees. Vein is striking 068 and dipping 70 to the NW.                                                                                                                                                                                        |                                   |                                                                                                           |               |   |                                      |   |                                                                                     |                                                                                     |
|                     |                                                                                |                        |                                                                                            |                                                                                                                                       |                                                                                                                                                                                                                                                                                                                                                                                                                                                               |                                   | View to NW of bed with fracture that has veins developed but which are further offset along the fracture                                                                                      | detail                                                                                            | detail                                                                                | reflected light view of grain mount                                                                                      | grain mount                                                                           |                                                                                     |                                                                                     |
| LC-1(2)             | 50o 37.075'N 002o 14.997'W                                                     | Purbeck, uppermost bed | Oyster shell limestone                                                                     | strike is E-W, dip is 80 to north; many orientations of fractures and veins criss cross beds but nearly all are orthogonal to bedding | A set that dips down to west is common but steeper and less steep ones are also present. There is a crack network with brown staining but no apparent calcite as well. It is not that easy to tell which cuts which. Some veins clearly appear bent and appear cut by straight ones, but the relative relationship with straight ones is ambiguous. This sample is of a steeply west dipping set associated with brown staining and a slightly vuggy texture. |                                   |                                                                                                          |              |  |                                     |                                                                                       |                                                                                     |                                                                                     |
|                     |                                                                                |                        |                                                                                            |                                                                                                                                       |                                                                                                                                                                                                                                                                                                                                                                                                                                                               |                                   | View to S of near vertical bed of Purbeck limestone showing network of fractures mainly orthogonal to bedding but in various orientations; sampled vein dips west (to right) about 60 degrees | detail                                                                                            |                                                                                       | reflected light view of grain mount                                                                                      |                                                                                       |                                                                                     |                                                                                     |
| LC-2(1)             | 008 50o 37.058'N 002o 14.941'W only exposed at lower tide levels               | Purbeck                | light grey limestone with fractures                                                        | strike is E-W with dip to N at ~ 75 degrees                                                                                           | At this particular outcrop it is a bed about 20cm thick of medium grey limestone Purbeck bed with adjacent more shaley beds. The photograph below looks south onto a bedding plane top surface and you see veins up to nearly 1cm thick that are sinistrally offset in this view, being displaced as noted in photo. They thin on the limbs where there is displacement.                                                                                      |                                   |                                                                                                          |              |  |                                     |  |                                                                                     |                                                                                     |
|                     |                                                                                |                        |                                                                                            |                                                                                                                                       |                                                                                                                                                                                                                                                                                                                                                                                                                                                               |                                   | View to S of top of bed showing oblique veins that have shear offset and considerable thinning                                                                                                | view of beds                                                                                      | view of beds                                                                          |                                                                                                                          | reflected light view of grain mount                                                   |                                                                                     |                                                                                     |
| LC-2(2)             | 50o 37.058'N 002o 14.941'W same outcrop as LC-2(1) but at opposite end of vein | Purbeck                | light grey limestone with fractures                                                        | strike is E-W with dip to N at ~ 75 degrees                                                                                           | See above for LC-2(1); this sample is of the same vein but on the other side of the limestone bed where the vein is present.                                                                                                                                                                                                                                                                                                                                  |                                   |                                                                                                          |              |  |                                                                                                                          |                                                                                       |                                                                                     |                                                                                     |
|                     |                                                                                |                        |                                                                                            |                                                                                                                                       |                                                                                                                                                                                                                                                                                                                                                                                                                                                               |                                   | View of opposite end of outcrop shown in LC-2(1) showing offset and sheared veins                                                                                                             | fragments for analysis                                                                            | View looking down from above top of outcrop; N is to the top                          |                                                                                                                          |                                                                                       |                                                                                     |                                                                                     |





| Sample # & Age (Ma) | GPS coord. | Stratigraphic Unit | Wall rock lithology | Structural Info/Orient'n | Vein information | U-Pb Analysis spatial information | Photograph #1                                                                       | Photograph #2                                                                       | Photograph #3                                                                       | Photograph #4                                                                       | Photograph #5                                                                       | Photograph #6                                                                       | Photograph #7                                                                       |
|---------------------|------------|--------------------|---------------------|--------------------------|------------------|-----------------------------------|-------------------------------------------------------------------------------------|-------------------------------------------------------------------------------------|-------------------------------------------------------------------------------------|-------------------------------------------------------------------------------------|-------------------------------------------------------------------------------------|-------------------------------------------------------------------------------------|-------------------------------------------------------------------------------------|
|                     |            |                    |                     |                          |                  |                                   |  |  |  |  |  |  |  |
